# Supplementary material
Source: PubMed Central journal article supplement (PMC3623063)
Supplement: bph0168-1933-SD1.pdf [file bph0168-1933-SD1.pdf]

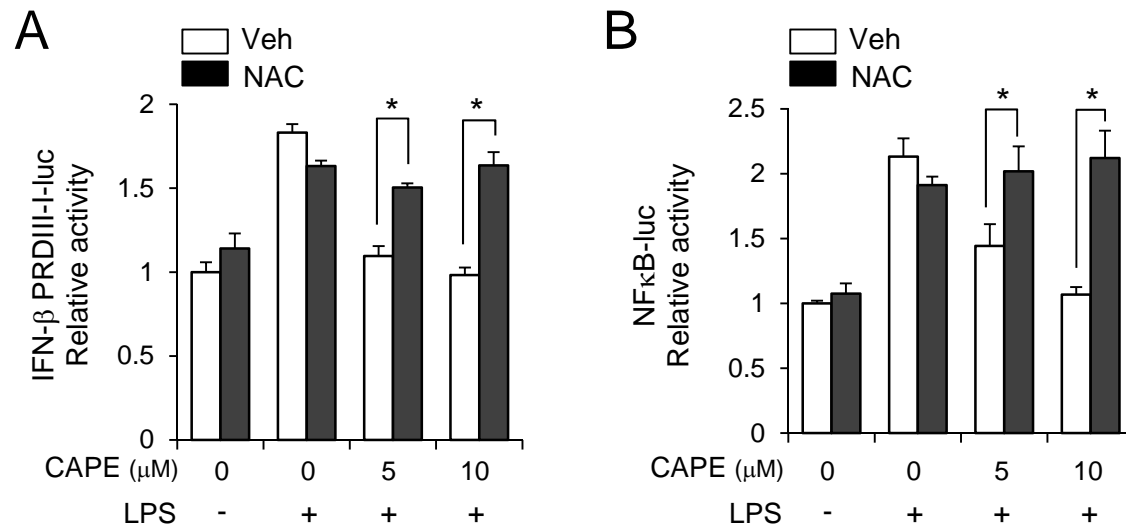

**Supplemental Figure 1. The inhibitory effects of caffeic acid phenethyl ester (CAPE) on LPS-induced activation of IRF3 and NFκB are reversed by thiol-donor in 293T cells reconstituted with TLR4 and MD2.** *A.* 293T cells were transfected with the expression plasmids for TLR4, TRIF and MD2 along with IFN-β PRDIII-I-luc. *B.* 293T cells were transfected with the expression plasmids for TLR4 and MD2 along with NFκB-luc. *A, B.* Cells were pre-treated with CAPE in the absence or presence of NAC (2 mM) for 1 h, and then stimulated with LPS (10 ng/ml) for an additional 8 h. Cell lysates were analyzed for luciferase and β-galactosidase activities. Relative luciferase activity was calculated after normalization with β-galactosidase activity. \*,  $p < 0.05$ .
